# Supplementary material for: Risk assessment of butyltins based on a fugacity-based food web bioaccumulation model in the Jincheng Bay mariculture area: II. Risk assessment
Source: Royal Society of Chemistry journal article supplement (doi:10.1039/c4em00240g), 2014-01-01
Supplement: c4em00240g1.pdf [file c4em00240g1.pdf]

## Supplementary Information

### This file includes:

Box S1

Fig. S1

Tables S1 to S3

Supplemental references

### Box S1 Toxicity data preparation

The internal toxicity data retrieved from the ERED database and the external toxicity data retrieved from the ECOTOX database (<http://cfpub.epa.gov/ecotox/>), including the NOELs, LOELs, and maximum acceptable toxicant concentrations (MATCs), were compiled into two separated Microsoft Visual FoxPro tables and standardized referring Zwart<sup>1</sup> to unify reported units in exposure duration, subjected to removal of records not fitting the chronic criteria, etc., by editing a Visual FoxPro programme. As the available NOELs were quite limited, the MATCs presented as one value and the highest concentration/dose showing less than 10% effect was also considered to be the corresponding NOELs. If an LOEL was reported for a certain species, while no NOEL was available, the LOEL was converted into the corresponding NOEL according to Kalf et al.<sup>2</sup> and Sijm et al.<sup>3</sup>, as follows:

- LOEC > 10 to 20% effects: NOEC = LOEC/2.
- LOEC 20 to 50% effect: NOEC = LOEC/3.
- LOEC ≥ 50% effects: NOEC = LOEC/10.

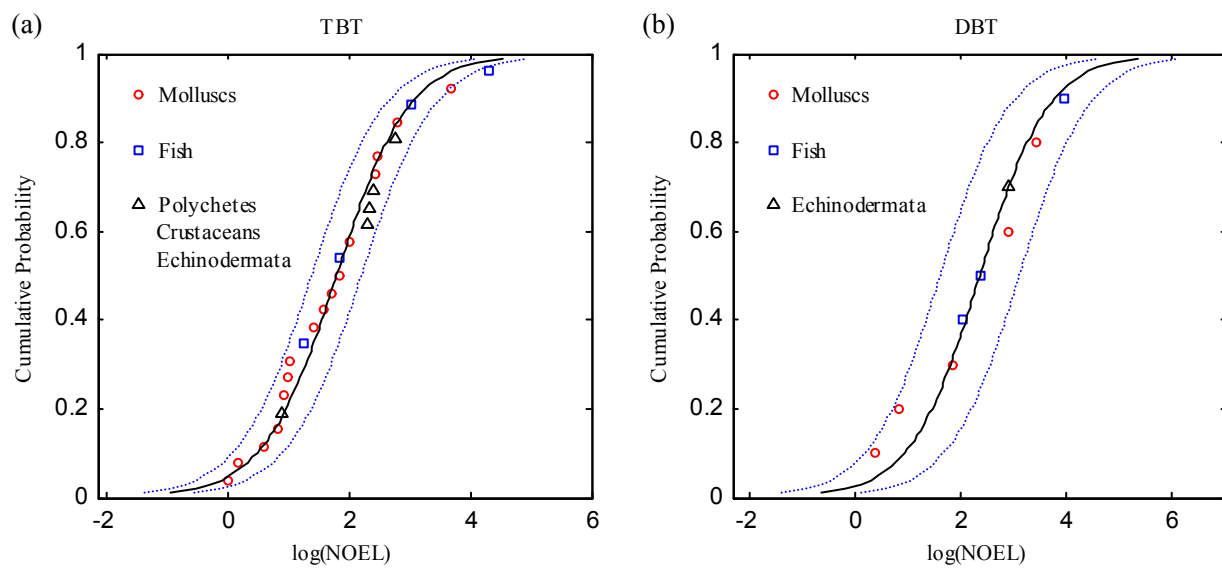

**Fig. S1** Species sensitivity distribution for TBT (a) and DBT (b)

**Table S1** Internal toxicity data for butyltins

| Species scientific name                 | Species Group | chemical | Organism Life Stage | Media Type | Effect Type  | Body Part  | Endpoint | Concentration (µg-Sn/g) | Reference Number          |
|-----------------------------------------|---------------|----------|---------------------|------------|--------------|------------|----------|-------------------------|---------------------------|
| TBT                                     |               |          |                     |            |              |            |          |                         |                           |
| <i>Arca zebra</i>                       | Molluscs      | TBT      | NR                  | NR         | Growth       | Whole Body | LOED     | 2.57E-2 <sup>§</sup>    | Weston06-064 <sup>¶</sup> |
| <i>Armandia brevis</i>                  | Echinodermata | TBT      | NR                  | NR         | Growth       | Whole Body | NOED     | 2.08E-1                 | Weston06-064              |
| <i>Callinectes sapidus</i>              | Crustaceans   | TBT      | Juvenile            | Ingestion  | Behavior     | Whole Body | NOED     | 2.04E-1                 | JA371                     |
| <i>Callinectes sapidus</i>              | Crustaceans   | TBT      | Juvenile            | Ingestion  | Growth       | Whole Body | NOED     | 2.04E-1                 | JA371                     |
| <i>Callinectes sapidus</i>              | Crustaceans   | TBT      | Juvenile            | Ingestion  | Physiology   | Whole Body | NOED     | 2.04E-1                 | JA371                     |
| <i>Crassostrea gigas</i>                | Molluscs      | TBTCl    | Immature            | Combined   | Morphology   | Whole Body | LOED     | 1.82E-2 <sup>‡</sup>    | URS62                     |
| <i>Crassostrea gigas</i>                | Molluscs      | TBTCl    | Immature            | Combined   | Growth       | Whole Body | LOED     | 1.37E-1 <sup>‡</sup>    | URS62                     |
| <i>Dreissena polymorpha</i>             | Molluscs      | TBTCl    | Adult               | Absorption | Growth       | Whole Body | NOED     | 4.63                    | URS219                    |
| <i>Dreissena polymorpha</i>             | Molluscs      | TBTCl    | Adult               | Absorption | Mortality    | Whole Body | NOED     | 4.63                    | URS219                    |
| <i>Gobiocypris rarus</i>                | Fish          | TBTCl    | Adult               | Water      | Behavior     | Muscle     | NOED     | 1.82E-2                 | MEC03-047                 |
| <i>Gobiocypris rarus</i>                | Fish          | TBTCl    | Adult               | Water      | Mortality    | Muscle     | NOED     | 1.82E-2                 | MEC03-047                 |
| <i>Hexaplex trunculus</i>               | Molluscs      | TBT      | Adult               | Combined   | Physiology   | Viscera    | NOED     | 6.52E-3                 | Weston05-148              |
| <i>Nassarius obsoletus</i> <sup>†</sup> | Molluscs      | TBTCl    | Immature            | Combined   | Reproduction | Whole Body | NOED     | 1.46E-3                 | JA58                      |
| <i>Leptasterias polaris</i>             | Echinodermata | TBT      | Adult               | Ingestion  | Biochemical  | Gonad      | NOED     | 5.75E-1                 | Weston05-033              |
| <i>Leptasterias polaris</i>             | Echinodermata | TBT      | Adult               | Ingestion  | Biochemical  | Gonad      | NOED     | 5.75E-1                 | Weston05-037              |
| <i>Littorina littorea</i>               | Molluscs      | TBTCl    | Adult               | Combined   | Reproduction | Whole Body | NOED     | 3.65E-2                 | SEQ98-29                  |
| <i>Mytilus edulis</i>                   | Molluscs      | TBT      | Adult               | Combined   | Biochemical  | Whole Body | NOED     | 9.38E-2                 | MEC04-095                 |
| <i>Mytilus edulis</i>                   | Molluscs      | TBT      | Adult               | Combined   | Growth       | Whole Body | NOED     | 9.38E-2                 | MEC04-095                 |
| <i>Mytilus edulis</i>                   | Molluscs      | TBT      | Adult               | Combined   | Biochemical  | Whole Body | NOED     | 2.75E-1                 | MEC04-095                 |
| <i>Mytilus edulis</i>                   | Molluscs      | TBT      | Adult               | Combined   | Growth       | Whole Body | NOED     | 2.75E-1                 | MEC04-095                 |
| <i>Mytilus edulis</i>                   | Molluscs      | TBTCl    | Adult               | Absorption | Behavior     | Whole Body | NOED     | 2.92E-1                 | URS235                    |
| <i>Mytilus edulis</i>                   | Molluscs      | TBTCl    | Adult               | Absorption | Physiology   | Whole Body | NOED     | 2.92E-1                 | URS235                    |
| <i>Mytilus edulis</i>                   | Molluscs      | TBTCl    | Adult               | Absorption | Physiology   | Whole Body | NOED     | 6.93E-1                 | URS235                    |
| <i>Nassarius reticulatus</i>            | Molluscs      | TBT      | Adult               | NR         | Cellular     | Whole Body | NOED     | 6.93E-2                 | MEC03-236                 |
| <i>Neanthes arenaceodentata</i>         | Polychetes    | TBTCl    | Adult               | Ingestion  | Growth       | Whole Body | NOED     | 1.64E-4                 | JA308                     |
| <i>Neanthes arenaceodentata</i>         | Polychetes    | TBTCl    | Adult               | Ingestion  | Mortality    | Whole Body | NOED     | 3.43E-4                 | JA308                     |

|                                 |            |       |          |            |              |              |      |                      |                              |
|---------------------------------|------------|-------|----------|------------|--------------|--------------|------|----------------------|------------------------------|
| <i>Neanthes arenaceodentata</i> | Polychetes | TBTCI | Adult    | Ingestion  | Reproduction | Whole Body   | NOED | 3.43E-4              | JA308                        |
| <i>Neanthes arenaceodentata</i> | Polychetes | TBTCI | Adult    | Ingestion  | Growth       | Whole Body   | NOED | 1.64E-1              | JA308                        |
| <i>Neanthes arenaceodentata</i> | Polychetes | TBTCI | Adult    | Ingestion  | Mortality    | Whole Body   | NOED | 3.43E-1              | JA308                        |
| <i>Neanthes arenaceodentata</i> | Polychetes | TBTCI | Adult    | Ingestion  | Reproduction | Whole Body   | NOED | 3.43E-1              | JA308                        |
| <i>Nereis arenaceodentata</i>   | Polychetes | TBTCI | Immature | Combined   | Growth       | Whole Body   | NOED | 1.96E-1              | ABB5                         |
| <i>Nereis arenaceodentata</i>   | Polychetes | TBTCI | Immature | Combined   | Survival     | Whole Body   | NOED | 3.41E-1              | ABB5                         |
| <i>Nucella lapillus</i>         | Molluscs   | TBT   | NR       | Water      | Physiology   | Soft Tissue  | NOED | 9.95E-3              | Weston06-071                 |
| <i>Nucella lapillus</i>         | Molluscs   | TBTCI | Adult    | Combined   | Development  | Whole Body   | NOED | 2.43E-2              | JB18                         |
| <i>Nucella lapillus</i>         | Molluscs   | TBT   | Egg      | Combined   | Reproduction | Whole Body   | NOED | 2.85E-2              | JA148                        |
| <i>Nucella lapillus</i>         | Molluscs   | TBTCI | Adult    | Combined   | Development  | Whole Body   | NOED | 3.31E-1              | JB18                         |
| <i>Nucella lapillus</i>         | Molluscs   | TBT   | Adult    | Absorption | Morphology   | Whole Body   | NOED | 4.73E-1              | JB18                         |
| <i>Nucella lapillus</i>         | Molluscs   | TBT   | Adult    | Combined   | Development  | Whole Body   | NOED | 8.03E-1              | JB18                         |
| <i>Nucella lima</i>             | Molluscs   | TBT   | NR       | NR         | Physiology   | Not Supplied | LOED | 1.00E-3 <sup>‡</sup> | NewFields07-004 <sup>‡</sup> |
| <i>Ocenebra erinacea</i>        | Molluscs   | TBT   | NR       | NR         | Physiology   | Not Supplied | LOED | 1.00E-2 <sup>‡</sup> | NewFields07-004 <sup>‡</sup> |
| <i>Ocenebra erinacea</i>        | Molluscs   | TBT   | NR       | NR         | Physiology   | Not Supplied | LOED | 1.00E-2 <sup>‡</sup> | NewFields07-004 <sup>‡</sup> |
| <i>Oncorhynchus mykiss</i>      | Fish       | TBT   | NR       | Water      | Cellular     | Whole Body   | NOED | 1.02                 | MEC04-222                    |
| <i>Oncorhynchus mykiss</i>      | Fish       | TBT   | NR       | Water      | Cellular     | Whole Body   | NOED | 1.14                 | MEC04-222                    |
| <i>Oryzias latipes</i>          | Fish       | TBT   | Adult    | Ingestion  | Reproduction | Eggs         | NOED | 3.10E-2              | Weston05-046                 |
| <i>Oryzias latipes</i>          | Fish       | TBT   | Adult    | Ingestion  | Reproduction | Eggs         | NOED | 1.04E-1              | Weston05-046                 |
| <i>Oryzias latipes</i>          | Fish       | TBT   | Adult    | Ingestion  | Reproduction | Eggs         | NOED | 1.08E-1              | Weston05-046                 |
| <i>Ostrea edulis</i>            | Molluscs   | TBT   | Adult    | Water      | Physiology   | Whole Body   | NOED | 1.63E-1              | JA449                        |
| <i>Ostrea edulis</i>            | Molluscs   | TBT   | Adult    | Water      | Physiology   | Whole Body   | NOED | 5.02E-1              | JA449                        |
| <i>Ruditapes decussata</i>      | Molluscs   | TBT   | Adult    | Water      | Biochemical  | Whole Body   | NOED | 2.15E-2              | Weston05-130                 |
| <i>Ruditapes decussata</i>      | Molluscs   | TBT   | Adult    | Water      | Biochemical  | Whole Body   | NOED | 6.24E-2              | Weston05-130                 |
| <i>Ruditapes decussata</i>      | Molluscs   | TBT   | Adult    | Water      | Biochemical  | Whole Body   | NOED | 9.40E-2              | Weston05-130                 |
| <i>Ruditapes decussata</i>      | Molluscs   | TBT   | NR       | Water      | Biochemical  | NR           | NOED | 9.40E-2              | MEC03-128                    |
| <i>Ruditapes decussata</i>      | Molluscs   | TBT   | Adult    | Water      | Biochemical  | Whole Body   | NOED | 1.01E-1              | Weston05-130                 |
| <i>Ruditapes decussata</i>      | Molluscs   | TBT   | Adult    | Water      | Biochemical  | Whole Body   | NOED | 1.18E-1              | Weston05-130                 |
| <i>Ruditapes decussata</i>      | Molluscs   | TBT   | NR       | Water      | Biochemical  | NR           | NOED | 1.18E-1              | MEC03-128                    |
| <i>Ruditapes decussata</i>      | Molluscs   | TBT   | Adult    | Water      | Biochemical  | Whole Body   | NOED | 3.39E-1              | Weston05-130                 |

|                                |               |       |          |            |              |            |      |                      |                |
|--------------------------------|---------------|-------|----------|------------|--------------|------------|------|----------------------|----------------|
| <i>Ruditapes decussata</i>     | Molluscs      | TBT   | NR       | Water      | Biochemical  | NR         | NOED | 2.15E+1              | MEC03-128      |
| <i>Ruditapes decussata</i>     | Molluscs      | TBT   | NR       | Water      | Biochemical  | NR         | NOED | 1.01E+2              | MEC03-128      |
| <i>Ruditapes decussata</i>     | Molluscs      | TBT   | NR       | Water      | Biochemical  | NR         | NOED | 3.39E+2              | MEC03-128      |
| <i>Saccostrea commercialis</i> | Molluscs      | TBTCl | Juvenile | Combined   | Morphology   | Whole Body | LOED | 2.19E-3 <sup>†</sup> | SEQ98-14       |
| <i>Saccostrea commercialis</i> | Molluscs      | TBTCl | Adult    | Combined   | Morphology   | Whole Body | LOED | 7.29E-3 <sup>†</sup> | SEQ98-14       |
| <i>Stenotomus chrysops</i>     | Fish          | TBTCl | Adult    | Injection  | Cellular     | Whole Body | NOED | 5.94                 | URS18          |
| <i>Stenotomus chrysops</i>     | Fish          | TBTCl | Adult    | Injection  | Cellular     | Liver      | NOED | 7.37E+1              | URS18          |
| <i>Thais bronni</i>            | Molluscs      | TBT   | NR       | NR         | Physiology   | Whole Body | LOED | 1.02E-2 <sup>†</sup> | Weston06-064   |
| <i>Thais clavigera</i>         | Molluscs      | TBT   | Adult    | Ingestion  | Physiology   | Whole Body | NOED | 8.24E-3              | NewFields09-22 |
| DBT                            |               |       |          |            |              |            |      |                      |                |
| <i>Dreissena polymorpha</i>    | Molluscs      | DBT   | Adult    | Absorption | Growth       | Whole Body | NOED | 8.39E-1              | URS219         |
| <i>Dreissena polymorpha</i>    | Molluscs      | DBT   | Adult    | Absorption | Mortality    | Whole Body | NOED | 8.39E-1              | URS219         |
| <i>Gobiocypris rarus</i>       | Fish          | DBT   | Adult    | Water      | Behavior     | Muscle     | NOED | 1.13E-1              | MEC03-047      |
| <i>Gobiocypris rarus</i>       | Fish          | DBT   | Adult    | Water      | Mortality    | Muscle     | NOED | 1.13E-1              | MEC03-047      |
| <i>Hexaplex trunculus</i>      | Molluscs      | DBT   | Adult    | Combined   | Physiology   | Viscera    | NOED | 7.02E-3              | Weston05-148   |
| <i>Leptasterias polaris</i>    | Echinodermata | DBT   | Adult    | Ingestion  | Biochemical  | Gonad      | NOED | 8.39E-1              | Weston05-037   |
| <i>Mytilus edulis</i>          | Molluscs      | DBT   | Adult    | Absorption | Behavior     | Whole Body | NOED | 2.25                 | URS235         |
| <i>Mytilus edulis</i>          | Molluscs      | DBT   | Adult    | Absorption | Physiology   | Whole Body | NOED | 3.63                 | URS235         |
| <i>Nucella lapillus</i>        | Molluscs      | DBT   | NR       | Absorption | Development  | Whole Body | NOED | 3.33E-2              | JA56           |
| <i>Nucella lapillus</i>        | Molluscs      | DBT   | NR       | Absorption | Reproduction | Whole Body | NOED | 3.33E-2              | JA56           |
| <i>Nucella lapillus</i>        | Molluscs      | DBT   | NR       | Injection  | Development  | Whole Body | NOED | 1.67E-1              | JA56           |
| <i>Nucella lapillus</i>        | Molluscs      | DBT   | NR       | Injection  | Mortality    | Whole Body | NOED | 1.67E-1              | JA56           |
| <i>Nucella lapillus</i>        | Molluscs      | DBT   | NR       | Injection  | Reproduction | Whole Body | NOED | 1.67E-1              | JA56           |
| <i>Oncorhynchus mykiss</i>     | Fish          | DBT   | NR       | Water      | Cellular     | Whole Body | NOED | 2.53E-1              | MEC04-222      |
| <i>Stenotomus chrysops</i>     | Fish          | DBT   | Adult    | Injection  | Cellular     | Liver      | NOED | 9.95                 | URS18          |
| <i>Thais clavigera</i>         | Molluscs      | DBT   | Adult    | Injection  | Reproduction | Whole Body | NOED | 2.53E-3              | SEQ97-1        |

NR, not reported; similarly hereafter.

<sup>†</sup> The original record of the scientific name of this species in the ERED (<http://www.wes.army.mil/el/ered>) was *Ilyanassa obsoleta*, amended following the species 2000 website for species scientific name retrieval (<http://www.sp2000.cn>).

‡ Converted NOED: NOED = LOED/2.

§ Converted NOED: NOED = LOED/3.

¶ Secondary sources of [Gibbs et al.<sup>4</sup>](#), [Short et al.<sup>5</sup>](#), and [Widdows et al.<sup>6</sup>](#) should be added to extract the details of the toxicity data for the LOEL conversion.

**Table S2** External toxicity data for butyltins

| Species Scientific Name     | Species Group | Chemical | Organism Life Stage | Media Type | Exposure Duration (day) | Effect Type  | Response Site | Endpoint | Concentration (ng-Sn/L) | Reference Number |
|-----------------------------|---------------|----------|---------------------|------------|-------------------------|--------------|---------------|----------|-------------------------|------------------|
| TBT                         |               |          |                     |            |                         |              |               |          |                         |                  |
| <i>Acanthomysis sculpta</i> | Crustaceans   | TBT      | Juvenile            | SW         | 27                      | Growth       | NR            | NOEC     | 1.22E+01                | 14746            |
| <i>Acanthomysis sculpta</i> | Crustaceans   | TBT      | Juvenile            | SW         | 14                      | Growth       | NR            | NOEC     | 2.85E+01                | 14746            |
| <i>Acanthomysis sculpta</i> | Crustaceans   | TBT      | Juvenile            | SW         | 54                      | Reproduction | NR            | NOEC     | 3.67E+01                | 14746            |
| <i>Acanthomysis sculpta</i> | Crustaceans   | TBT      | Juvenile            | SW         | 48                      | Growth       | NR            | NOEC     | 9.79E+01                | 14746            |
| <i>Acanthomysis sculpta</i> | Crustaceans   | TBT      | Juvenile            | SW         | 48                      | Growth       | NR            | NOEC     | 9.79E+01                | 14746            |
| <i>Acanthomysis sculpta</i> | Crustaceans   | TBT      | Juvenile            | SW         | 39                      | Growth       | NR            | NOEC     | 1.02E+02                | 14746            |
| <i>Acanthomysis sculpta</i> | Crustaceans   | TBT      | Juvenile            | SW         | 63                      | Growth       | NR            | NOEC     | 1.02E+02                | 14746            |
| <i>Acanthomysis sculpta</i> | Crustaceans   | TBT      | Juvenile            | SW         | 63                      | Growth       | NR            | NOEC     | 1.02E+02                | 14746            |
| <i>Acanthomysis sculpta</i> | Crustaceans   | TBT      | Juvenile            | SW         | 63                      | Mortality    | NR            | NOEC     | 1.02E+02                | 14746            |
| <i>Acanthomysis sculpta</i> | Crustaceans   | TBT      | Juvenile            | SW         | 28                      | Growth       | NR            | NOEC     | 1.10E+02                | 14746            |
| <i>Acanthomysis sculpta</i> | Crustaceans   | TBT      | Juvenile            | SW         | 28                      | Growth       | NR            | NOEC     | 1.10E+02                | 14746            |
| <i>Acanthomysis sculpta</i> | Crustaceans   | TBT      | Juvenile            | SW         | 10                      | Growth       | NR            | NOEC     | 1.30E+02                | 14746            |
| <i>Acanthomysis sculpta</i> | Crustaceans   | TBT      | Juvenile            | SW         | 6                       | Growth       | NR            | NOEC     | 1.55E+02                | 14746            |
| <i>Acanthomysis sculpta</i> | Crustaceans   | TBT      | Juvenile            | SW         | 21                      | Mortality    | NR            | NOEC     | 1.55E+02                | 14746            |
| <i>Acanthomysis sculpta</i> | Crustaceans   | TBT      | Juvenile            | SW         | 41                      | Mortality    | NR            | NOEC     | 1.55E+02                | 14746            |
| <i>Acanthomysis sculpta</i> | Crustaceans   | TBT      | Juvenile            | SW         | 63                      | Growth       | NR            | NOEC     | 1.55E+02                | 14746            |
| <i>Acanthomysis sculpta</i> | Crustaceans   | TBT      | Juvenile            | SW         | 63                      | Growth       | NR            | NOEC     | 1.55E+02                | 14746            |
| <i>Acanthomysis sculpta</i> | Crustaceans   | TBT      | Juvenile            | SW         | 28                      | Growth       | NR            | NOEC     | 2.00E+02                | 14746            |
| <i>Acanthomysis sculpta</i> | Crustaceans   | TBT      | Juvenile            | SW         | 28                      | Growth       | NR            | NOEC     | 2.00E+02                | 14746            |

|                                       |             |       |          |    |     |              |             |      |          |                                        |
|---------------------------------------|-------------|-------|----------|----|-----|--------------|-------------|------|----------|----------------------------------------|
| <i>Acanthomysis sculpta</i>           | Crustaceans | TBT   | Juvenile | SW | 10  | Growth       | NR          | NOEC | 2.45E+02 | 14746                                  |
| <i>Acartia tonsa</i>                  | Crustaceans | TBTCl | Nauplii  | SW | 6   | Mortality    | NR          | NOEC | 3.65     | 3199                                   |
| <i>Acartia tonsa</i>                  | Crustaceans | TBTCl | Nauplii  | SW | 6   | Mortality    | NR          | NOEC | 4.38     | 3199                                   |
| <i>Acropora tenuis</i>                | Cnidaria    | TBTCl | Juvenile | SW | 10  | Physiology   | NR          | NOEL | 7.29E+01 | 102066                                 |
| <i>Algae</i>                          | Algae       | TBTCl | NR       | SW | 21  | Population   | NR          | NOEC | 3.09E+01 | 17785                                  |
| <i>Algae</i>                          | Algae       | TBTCl | NR       | SW | 14  | Population   | NR          | NOEC | 6.65E+01 | 17785                                  |
| <i>Algae</i>                          | Algae       | TBTCl | NR       | SW | 14  | Population   | NR          | NOEC | 8.67E+01 | 17785                                  |
| <i>Algae</i>                          | Algae       | TBTCl | NR       | SW | 21  | Population   | NR          | NOEC | 1.10E+02 | 17785                                  |
| <i>Algae</i>                          | Algae       | TBTCl | NR       | SW | 14  | Population   | NR          | NOEC | 1.54E+02 | 17785                                  |
| <i>Algae</i>                          | Algae       | TBTCl | NR       | SW | 21  | Population   | NR          | NOEC | 1.78E+02 | 17785                                  |
| <i>Allorchestes compressa</i>         | Crustaceans | TBTCl | NR       | SW | 4   | Mortality    | NR          | NOEC | 4.56E+03 | 14985                                  |
| <i>Allorchestes compressa</i>         | Crustaceans | TBTCl | NR       | SW | 4   | Mortality    | NR          | NOEC | 9.12E+03 | 14985                                  |
| <i>Allorchestes compressa</i>         | Crustaceans | TBTCl | NR       | SW | 4   | Mortality    | NR          | NOEC | 1.82E+04 | 14985                                  |
| <i>Americamysis bahia</i>             | Crustaceans | TBTO  | Larvae   | SW | 31  | Mortality    | NR          | NOEC | 2.47E+01 | 73494                                  |
| <i>Americamysis bahia</i>             | Crustaceans | TBTO  | Larvae   | SW | 31  | Growth       | NR          | NOEC | 5.83E+01 | 73494                                  |
| <i>Americamysis bahia</i>             | Crustaceans | TBTO  | Larvae   | SW | 31  | Reproduction | NR          | NOEC | 5.83E+01 | 73494                                  |
| <i>Americamysis bahia</i>             | Crustaceans | TBTO  | Larvae   | SW | 31  | Growth       | NR          | NOEC | 9.22E+01 | 73494                                  |
| <i>Bolinus brandaris</i>              | Molluscs    | TBTCl | NR       | SW | 31  | Biochemical  | Ganglion    | NOEC | 1.82E+05 | 96057                                  |
| <i>Bolinus brandaris</i>              | Molluscs    | TBTCl | NR       | SW | 31  | Growth       | Penis       | NOEC | 1.82E+05 | 96057                                  |
| <i>Chironomus riparius</i>            | Insects     | TBTCl | Larvae   | FW | 10  | Growth       | NR          | NOEC | 9.48E+02 | 7176                                   |
| <i>Chlorella fusca ssp. Vacuolata</i> | Algae       | TBTCl | NR       | SW | 1   | Population   | NR          | NOEC | 1.58E+04 | 90044                                  |
| <i>Chroococcus minor</i>              | Algae       | TBTCl | NR       | SW | 7   | Growth       | NR          | EC10 | 3.25E+04 | <a href="#">Bao et al.<sup>7</sup></a> |
| <i>Corophium volutator</i>            | Crustaceans | TBTCl | Adult    | SW | 10  | Mortality    | NR          | NOEC | 3.90E+01 | 20478                                  |
| <i>Danio rerio</i>                    | Fish        | TBT   | Larvae   | FW | 122 | Cellular     | Erythrocyte | NOEC | 3.67E+04 | 106560                                 |
| <i>Daphnia magna</i>                  | Crustaceans | TBTO  | NR       | FW | 21  | Reproduction | NR          | NOEC | 3.19E+01 | 847                                    |
| <i>Daphnia magna</i>                  | Crustaceans | TBTO  | NR       | FW | 21  | Behavior     | NR          | NOEC | 3.19E+01 | 6628                                   |
| <i>Daphnia magna</i>                  | Crustaceans | TBTCl | Neonate  | FW | 21  | Development  | NR          | NOEC | 3.65E+02 | 20032                                  |
| <i>Daphnia magna</i>                  | Crustaceans | TBTCl | Neonate  | FW | 21  | Population   | NR          | NOEC | 3.65E+02 | 20032                                  |
| <i>Daphnia magna</i>                  | Crustaceans | TBTCl | Neonate  | FW | 21  | Reproduction | NR          | NOEC | 3.65E+02 | 20032                                  |
| <i>Daphnia magna</i>                  | Crustaceans | TBTCl | Neonate  | FW | 21  | Reproduction | NR          | NOEC | 3.65E+02 | 20032                                  |

|                                   |               |       |                             |    |     |              |       |      |                   |        |
|-----------------------------------|---------------|-------|-----------------------------|----|-----|--------------|-------|------|-------------------|--------|
| <i>Daphnia magna</i>              | Crustaceans   | TBTCl | Neonate                     | FW | 21  | Reproduction | NR    | NOEC | 3.65E+02          | 20032  |
| <i>Daphnia magna</i>              | Crustaceans   | TBTCl | Neonate                     | FW | 21  | Reproduction | NR    | NOEC | 3.65E+02          | 20032  |
| <i>Daphnia magna</i>              | Crustaceans   | TBTCl | Neonate                     | FW | 21  | Reproduction | NR    | NOEC | 3.65E+02          | 20032  |
| <i>Daphnia magna</i>              | Crustaceans   | TBTCl | Neonate                     | FW | 21  | Reproduction | NR    | NOEC | 3.65E+02          | 20032  |
| <i>Daphnia magna</i>              | Crustaceans   | TBTCl | Neonate                     | FW | 21  | Reproduction | NR    | NOEC | 3.65E+02          | 20032  |
| <i>Daphnia magna</i>              | Crustaceans   | TBTO  | NR                          | FW | 21  | Reproduction | NR    | NOEC | 3.98E+01          | 56312  |
| <i>Daphnia magna</i>              | Crustaceans   | TBTO  | Neonate                     | FW | 21  | Reproduction | NR    | NOEC | 1.99E+01          | 59761  |
| <i>Daphnia magna</i>              | Crustaceans   | TBTO  | Neonate                     | FW | 21  | Reproduction | NR    | NOEL | 1.99E+01          | 59761  |
| <i>Daphnia magna</i>              | Crustaceans   | TBTO  | Neonate                     | FW | 21  | Reproduction | NR    | MATC | 2.79E+01          | 59761  |
| <i>Daphnia magna</i>              | Crustaceans   | TBTO  | Neonate                     | FW | 21  | Growth       | NR    | NOEC | 4.98E+01          | 60672  |
| <i>Daphnia magna</i>              | Crustaceans   | TBTO  | Neonate                     | FW | 21  | Mortality    | NR    | NOEC | 4.98E+01          | 60672  |
| <i>Daphnia magna</i>              | Crustaceans   | TBTO  | Neonate                     | FW | 21  | Reproduction | NR    | NOEC | 4.98E+01          | 60672  |
| <i>Daphnia magna</i>              | Crustaceans   | TBTO  | Neonate                     | FW | 21  | Reproduction | NR    | NOEC | 4.98E+01          | 60672  |
| <i>Echinocardium cordatum</i>     | Echinodermata | TBTCl | Adult                       | SW | 14  | Mortality    | NR    | NOEC | 3.90E+01          | 20478  |
| <i>Echinocardium cordatum</i>     | Echinodermata | TBTCl | Adult                       | SW | 28  | Mortality    | NR    | NOEC | 3.90E+01          | 20478  |
| <i>Echinoparyphium recurvatum</i> | Worms         | TBTO  | NR                          | FW | 30  | Mortality    | NR    | NOEL | 1.99E+03          | 80004  |
| <i>Echinoparyphium recurvatum</i> | Worms         | TBTO  | NR                          | FW | 30  | Population   | NR    | NOEL | 1.99E+03          | 80004  |
| <i>Echinoparyphium recurvatum</i> | Worms         | TBTO  | NR                          | FW | 30  | Population   | NR    | NOEL | 1.99E+03          | 80004  |
| <i>Entomoneis punctulata</i>      | Algae         | TBTCl | Exponential<br>Growth Phase | SW | 3   | Population   | NR    | NOEC | 2.70E+04          | 110086 |
| <i>Hexagenia limbata</i>          | Insects       | TBTCl | Larvae                      | FW | 112 | Mortality    | NR    | LOEC | 1.75 <sup>‡</sup> | 86339  |
| <i>Hexagenia limbata</i>          | Insects       | TBTCl | Larvae                      | FW | 112 | Population   | NR    | LOEC | 1.75 <sup>‡</sup> | 86339  |
| <i>Hexagenia sp.</i>              | Insects       | TBTCl | Nymph                       | FW | 21  | Growth       | NR    | NOEC | 1.82E+02          | 7176   |
| <i>Hexagenia sp.</i>              | Insects       | TBTCl | Nymph                       | FW | 21  | Mortality    | NR    | NOEC | 3.28E+02          | 7176   |
| <i>Hoplias malabaricus</i>        | Fish          | TBTCl | Mature                      | FW | 70  | Zygote       | Blood | NOEC | 1.09E+05          | 85793  |
| <i>Hoplias malabaricus</i>        | Fish          | TBTCl | Mature                      | FW | 70  | Zygote       | Blood | NOEC | 1.09E+05          | 85793  |
| <i>Hoplias malabaricus</i>        | Fish          | TBTCl | Mature                      | FW | 70  | Zygote       | Blood | NOEC | 1.09E+05          | 85793  |
| <i>Hoplias malabaricus</i>        | Fish          | TBTCl | Mature                      | FW | 70  | Zygote       | Blood | NOEC | 1.09E+05          | 85793  |
| <i>Hoplias malabaricus</i>        | Fish          | TBTCl | Mature                      | FW | 70  | Zygote       | Blood | NOEC | 1.09E+05          | 85793  |
| <i>Hoplias malabaricus</i>        | Fish          | TBTCl | Mature                      | FW | 70  | Cellular     | Blood | NOEC | 1.09E+05          | 85793  |





|                              |          |       |                          |    |     |              |                       |      |          |        |
|------------------------------|----------|-------|--------------------------|----|-----|--------------|-----------------------|------|----------|--------|
| <i>Marisa cornuarietis</i>   | Molluscs | TBTCI | Sexually Mature          | FW | 150 | Biochemical  | Multiple Tissue/Organ | NOEC | 1.82E+02 | 99181  |
| <i>Mytilus edulis</i>        | Molluscs | TBT   | Larvae                   | SW | 33  | Growth       | NR                    | NOEC | 2.45     | 6982   |
| <i>Mytilus edulis</i>        | Molluscs | TBT   | Larvae                   | SW | 33  | Growth       | NR                    | MATC | 6.93     | 6982   |
| <i>Mytilus edulis</i>        | Molluscs | TBTCI | Post Larvae              | SW | 15  | Growth       | NR                    | EC10 | 1.97E+01 | 19280  |
| <i>Nassarius obsoletus</i>   | Molluscs | TBTCI | NR                       | SW | 45  | Physiology   | NR                    | NOEC | 7.29E+01 | 82438  |
| <i>Nassarius obsoletus</i>   | Molluscs | TBTCI | NR                       | SW | 45  | Mortality    | NR                    | NOEC | 7.29     | 105674 |
| <i>Nassarius reticulatus</i> | Molluscs | TBT   | Sexually Mature          | FW | 14  | Growth       | Penis                 | NOEC | 2.04E+01 | 69835  |
| <i>Nassarius reticulatus</i> | Molluscs | TBT   | Sexually Mature          | FW | 30  | Growth       | Penis                 | NOEC | 2.04E+01 | 69835  |
| <i>Nassarius reticulatus</i> | Molluscs | TBT   | Sexually Mature          | FW | 61  | Growth       | Penis                 | NOEC | 2.04E+01 | 69835  |
| <i>Nassarius reticulatus</i> | Molluscs | TBT   | Sexually Mature          | FW | 91  | Growth       | Penis                 | NOEC | 2.04E+01 | 69835  |
| <i>Nassarius reticulatus</i> | Molluscs | TBT   | Sexually Mature          | FW | 122 | Growth       | Penis                 | NOEC | 2.04E+01 | 69835  |
| <i>Nassarius reticulatus</i> | Molluscs | TBT   | Sexually Mature          | FW | 152 | Growth       | Penis                 | NOEC | 2.04E+01 | 69835  |
| <i>Nassarius reticulatus</i> | Molluscs | TBTCI | Adult                    | SW | 61  | Biochemical  | Soft Tissue           | NOEC | 1.46E+02 | 79867  |
| <i>Nassarius reticulatus</i> | Molluscs | TBTCI | Adult                    | SW | 61  | Biochemical  | Soft Tissue           | NOEC | 1.46E+02 | 79867  |
| <i>Nassarius reticulatus</i> | Molluscs | TBTCI | Adult                    | SW | 61  | Growth       | Penis                 | NOEC | 1.46E+02 | 79867  |
| <i>Nassarius reticulatus</i> | Molluscs | TBTCI | Adult                    | SW | 61  | Growth       | Penis                 | NOEC | 1.82E+02 | 79867  |
| <i>Nitzschia closterium</i>  | Algae    | TBTCI | Exponential Growth Phase | SW | 3   | Population   | NR                    | NOEC | 7.29E+02 | 110086 |
| <i>Nucella lapillus</i>      | Molluscs | TBTO  | Adult                    | SW | 30  | Growth       | Penis                 | NOEC | 1.51E+02 | 9998   |
| <i>Nucella lapillus</i>      | Molluscs | TBT   | Sexually Mature          | FW | 14  | Growth       | Penis                 | NOEC | 2.04E+01 | 69835  |
| <i>Nucella lapillus</i>      | Molluscs | TBT   | Sexually Mature          | FW | 15  | Reproduction | Seminal Vesicle       | NOEC | 2.04E+01 | 69835  |
| <i>Nucella lapillus</i>      | Molluscs | TBT   | Sexually Mature          | FW | 30  | Growth       | Penis                 | NOEC | 2.04E+01 | 69835  |
| <i>Nucella lapillus</i>      | Molluscs | TBT   | Sexually Mature          | FW | 30  | Reproduction | Seminal Vesicle       | NOEC | 2.04E+01 | 69835  |
| <i>Nucella lapillus</i>      | Molluscs | TBT   | Sexually Mature          | FW | 61  | Growth       | Penis                 | NOEC | 2.04E+01 | 69835  |
| <i>Nucella lapillus</i>      | Molluscs | TBT   | Sexually Mature          | FW | 61  | Reproduction | Seminal Vesicle       | NOEC | 2.04E+01 | 69835  |
| <i>Nucella lapillus</i>      | Molluscs | TBT   | Sexually Mature          | FW | 91  | Growth       | Penis                 | NOEC | 2.04E+01 | 69835  |
| <i>Nucella lapillus</i>      | Molluscs | TBT   | Sexually Mature          | FW | 91  | Reproduction | Seminal Vesicle       | NOEC | 2.04E+01 | 69835  |
| <i>Nucella lapillus</i>      | Molluscs | TBT   | Sexually Mature          | FW | 122 | Growth       | Penis                 | NOEC | 2.04E+01 | 69835  |
| <i>Nucella lapillus</i>      | Molluscs | TBT   | Sexually Mature          | FW | 122 | Reproduction | Seminal Vesicle       | NOEC | 2.04E+01 | 69835  |

|                                |          |       |                 |    |     |              |                          |      |          |        |
|--------------------------------|----------|-------|-----------------|----|-----|--------------|--------------------------|------|----------|--------|
| <i>Nucella lapillus</i>        | Molluscs | TBT   | Sexually Mature | FW | 152 | Growth       | Penis                    | NOEC | 2.04E+01 | 69835  |
| <i>Nucella lapillus</i>        | Molluscs | TBT   | Sexually Mature | FW | 152 | Reproduction | Seminal Vesicle          | NOEC | 2.04E+01 | 69835  |
| <i>Nucella lapillus</i>        | Molluscs | TBTO  | Adult           | SW | 343 | Reproduction | Egg                      | NOEC | 1.48     | 73497  |
| <i>Nucella lapillus</i>        | Molluscs | TBTO  | Adult           | SW | 343 | Reproduction | Egg                      | NOEC | 1.48     | 73497  |
| <i>Nucella lapillus</i>        | Molluscs | TBTO  | Egg             | SW | 236 | Mortality    | NR                       | NOEC | 5.54     | 73497  |
| <i>Nucella lapillus</i>        | Molluscs | TBTCl | Adult           | SW | 91  | Biochemical  | Soft Tissue              | NOEC | 1.82E+01 | 95703  |
| <i>Nucella lapillus</i>        | Molluscs | TBTCl | Adult           | SW | 91  | Biochemical  | Soft Tissue              | NOEC | 1.82E+01 | 95703  |
| <i>Nucella lapillus</i>        | Molluscs | TBTCl | Adult           | SW | 91  | Biochemical  | Soft Tissue              | NOEC | 1.82E+01 | 95703  |
| <i>Oncomelania quadrasi</i>    | Molluscs | TBTO  | Young           | FW | 70  | Growth       | NR                       | NOEL | 5.97E+01 | 94583  |
| <i>Oncomelania quadrasi</i>    | Molluscs | TBTO  | NR              | FW | 70  | Physiology   | NR                       | NOEL | 2.39E+03 | 94583  |
| <i>Oncorhynchus mykiss</i>     | Fish     | TBTCl | NR              | FW | 110 | Behavior     | NR                       | NOEC | 1.46E+01 | 56312  |
| <i>Oncorhynchus mykiss</i>     | Fish     | TBTCl | NR              | FW | 110 | Mortality    | NR                       | NOEC | 1.46E+01 | 56312  |
| <i>Oncorhynchus mykiss</i>     | Fish     | TBTO  | Embryo          | FW | 63  | Growth       | NR                       | NOEC | 8.40E+01 | 99247  |
| <i>Oncorhynchus mykiss</i>     | Fish     | TBTO  | Embryo          | FW | 63  | Growth       | NR                       | NOEC | 8.44E+01 | 99247  |
| <i>Oncorhynchus mykiss</i>     | Fish     | TBTO  | Embryo          | FW | 33  | Mortality    | NR                       | NOEC | 1.44E+02 | 99247  |
| <i>Oncorhynchus mykiss</i>     | Fish     | TBTO  | Embryo          | FW | 63  | Development  | NR                       | NOEC | 1.44E+02 | 99247  |
| <i>Oncorhynchus mykiss</i>     | Fish     | TBTO  | Embryo          | FW | 63  | Mortality    | NR                       | NOEC | 3.20E+02 | 99247  |
| <i>Oncorhynchus mykiss</i>     | Fish     | TBTO  | Embryo          | FW | 63  | Mortality    | NR                       | NOEC | 3.20E+02 | 99247  |
| <i>Oreochromis mossambicus</i> | Fish     | TBTO  | Sexually Mature | FW | 35  | Growth       | NR                       | NOEL | 9.96E+02 | 60780  |
| <i>Oryzias latipes</i>         | Fish     | TBTO  | Juvenile        | FW | 28  | Cellular     | Multiple<br>Tissue/Organ | NOEC | 6.37E+04 | 9631   |
| <i>Oryzias latipes</i>         | Fish     | TBTO  | Juvenile        | FW | 84  | Cellular     | Multiple<br>Tissue/Organ | NOEC | 6.37E+04 | 9631   |
| <i>Oryzias latipes</i>         | Fish     | TBTO  | NR              | FW | 28  | Cellular     | NR                       | NOEC | 6.37E+01 | 56312  |
| <i>Oryzias latipes</i>         | Fish     | TBTO  | Juvenile        | FW | 90  | Reproduction | NR                       | NOEL | 6.57E+02 | 99011  |
| <i>Oryzias latipes</i>         | Fish     | TBTO  | Juvenile        | FW | 90  | Mortality    | NR                       | NOEL | 8.96E+02 | 99011  |
| <i>Oryzias latipes</i>         | Fish     | TBTO  | Egg             | FW | 91  | Cellular     | NR                       | NOEC | 6.37E+04 | 99046  |
| <i>Oryzias latipes</i>         | Fish     | TBTO  | Egg             | FW | 30  | Mortality    | NR                       | NOEC | 1.99E+05 | 99046  |
| <i>Oryzias sp.</i>             | Fish     | TBTO  | NR              | FW | 28  | Behavior     | NR                       | NOEC | 6.37E+02 | 56312  |
| <i>Parorchis acanthus</i>      | Worms    | TBTAc | Larvae          | SW | 21  | Mortality    | NR                       | NOEC | 3.40E+01 | 115744 |

|                                        |             |       |                             |    |    |             |                          |      |                       |                                        |
|----------------------------------------|-------------|-------|-----------------------------|----|----|-------------|--------------------------|------|-----------------------|----------------------------------------|
| <i>Parorchis acanthus</i>              | Worms       | TBTAc | Cyst                        | SW | 21 | Mortality   | NR                       | NOEC | 3.40E+03              | 115744                                 |
| <i>Penaeus duorarum</i>                | Crustaceans | TBTO  | NR                          | SW | 4  | Mortality   | NR                       | NOEC | 4.58E+02              | 99255                                  |
| <i>Phaeodactylum tricornutum</i>       | Algae       | TBTO  | Exponential<br>Growth Phase | SW | 3  | Population  | NR                       | NOEL | 1.19E+03              | 17390                                  |
| <i>Phyllospora comosa</i>              | Algae       | TBTCl | Embryo                      | SW | 4  | Mortality   | NR                       | NOEC | 3.65E-01              | 14985                                  |
| <i>Phyllospora comosa</i>              | Algae       | TBTCl | Zygote                      | SW | 4  | Mortality   | NR                       | NOEC | 3.65E-01              | 14985                                  |
| <i>Physa fontinalis</i>                | Molluscs    | TBTO  | NR                          | FW | 30 | Mortality   | NR                       | LOEL | 9.96E+02 <sup>†</sup> | 80004                                  |
| <i>Pimephales promelas</i>             | Fish        | TBTO  | Embryo                      | FW | 33 | Growth      | Whole Organism           | NOEC | 2.99E+01              | 59761                                  |
| <i>Pimephales promelas</i>             | Fish        | TBTO  | Embryo                      | FW | 33 | Population  | NR                       | NOEL | 8.96E+01              | 59761                                  |
| <i>Pimephales promelas</i>             | Fish        | TBTO  | Embryo                      | FW | 33 | Development | NR                       | NOEL | 1.83E+02              | 59761                                  |
| <i>Pimephales promelas</i>             | Fish        | TBTO  | Embryo                      | FW | 33 | Mortality   | NR                       | NOEL | 1.83E+02              | 59761                                  |
| <i>Pimephales promelas</i>             | Fish        | TBTO  | Embryo                      | FW | 33 | Mortality   | NR                       | NOEC | 4.38E+02              | 59761                                  |
| <i>Pimephales promelas</i>             | Fish        | TBTO  | Embryo                      | FW | 33 | Growth      | Whole Organism           | NOEC | 3.01E+01              | 150898                                 |
| <i>Pimephales promelas</i>             | Fish        | TBTO  | Embryo                      | FW | 33 | Growth      | Whole Organism           | MATC | 5.20E+01              | 150898                                 |
| <i>Pimephales promelas</i>             | Fish        | TBTO  | Embryo                      | FW | 33 | Growth      | Whole Organism           | MATC | 5.20E+01              | 150898                                 |
| <i>Pimephales promelas</i>             | Fish        | TBTO  | Embryo                      | FW | 33 | Mortality   | NR                       | MATC | 2.95E+02              | 150898                                 |
| <i>Poecilia reticulata</i>             | Fish        | TBTO  | Juvenile                    | FW | 28 | Cellular    | Multiple<br>Tissue/Organ | NOEC | 1.99E+03              | 9631                                   |
| <i>Poecilia reticulata</i>             | Fish        | TBTO  | Juvenile                    | FW | 84 | Cellular    | Multiple<br>Tissue/Organ | NOEC | 1.99E+03              | 9631                                   |
| <i>Poecilia reticulata</i>             | Fish        | TBTO  | NR                          | FW | 30 | Cellular    | Multiple<br>Tissue/Organ | NOEC | 1.99                  | 12607                                  |
| <i>Poecilia reticulata</i>             | Fish        | TBTO  | NR                          | FW | 91 | Growth      | NR                       | NOEC | 6.37E+01              | 12607                                  |
| <i>Poecilia reticulata</i>             | Fish        | TBTO  | NR                          | FW | 90 | Cellular    | NR                       | NOEC | 1.99                  | 56312                                  |
| <i>Poecilia reticulata</i>             | Fish        | TBTO  | NR                          | FW | 90 | Growth      | NR                       | NOEC | 6.37E+01              | 56312                                  |
| <i>Poecilia reticulata</i>             | Fish        | TBTO  | Juvenile                    | FW | 91 | Cellular    | NR                       | NOEC | 1.99E+03              | 99046                                  |
| <i>Poecilia reticulata</i>             | Fish        | TBTO  | Juvenile                    | FW | 91 | Mortality   | NR                       | NOEC | 6.37E+04              | 99046                                  |
| <i>Pseudokirchneriella subcapitata</i> | Algae       | TBTCl | Exponential<br>Growth Phase | FW | 4  | Population  | NR                       | NOEC | 4.38E+02              | 73495                                  |
| <i>Pyrocystis lunula</i>               | Algae       | TBTCl | NR                          | SW | 1  | Growth      | NR                       | EC10 | 3.32E+04              | <a href="#">Bao et al.<sup>7</sup></a> |

|                                 |             |       |          |    |     |              |                |      |          |                                        |
|---------------------------------|-------------|-------|----------|----|-----|--------------|----------------|------|----------|----------------------------------------|
| <i>Pyrocystis lunula</i>        | Algae       | TBTC1 | NR       | SW | 1   | Population   | NR             | NOEC | 3.57E+04 | 110086                                 |
| <i>Ruditapes decussatus</i>     | Molluscs    | TBT   | Juvenile | SW | 190 | Growth       | Shell          | NOEC | 1.02E+02 | 93809                                  |
| <i>Ruditapes decussatus</i>     | Molluscs    | TBT   | Juvenile | SW | 730 | Growth       | Shell          | NOEC | 1.02E+02 | 93809                                  |
| <i>Ruditapes decussatus</i>     | Molluscs    | TBT   | Juvenile | SW | 730 | Growth       | Whole Organism | NOEC | 1.02E+02 | 93809                                  |
| <i>Ruditapes decussatus</i>     | Molluscs    | TBT   | Juvenile | SW | 730 | Growth       | Whole Organism | NOEC | 1.02E+02 | 93809                                  |
| <i>Ruditapes decussatus</i>     | Molluscs    | TBT   | Juvenile | SW | 730 | Growth       | Whole Organism | NOEC | 1.02E+02 | 93809                                  |
| <i>Schistosoma japonicum</i>    | Worms       | TBTO  | NR       | FW | 133 | Reproduction | NR             | NOEL | 5.97E+01 | 94583                                  |
| <i>Schistosoma japonicum</i>    | Worms       | TBTO  | NR       | FW | 133 | Reproduction | NR             | NOEL | 5.97E+01 | 94583                                  |
| <i>Sebastes schlegeli</i>       | Fish        | TBT   | Fry      | FW | 29  | Population   | NR             | NOEC | 2.04E+07 | 82331                                  |
| <i>Sillago japonica</i>         | Fish        | TBTO  | Adult    | SW | 30  | Mortality    | NR             | NOEL | 3.98E+06 | 96153                                  |
| <i>Sillago japonica</i>         | Fish        | TBTO  | Adult    | SW | 30  | Reproduction | NR             | NOEL | 3.98E+06 | 96153                                  |
| <i>Sillago japonica</i>         | Fish        | TBTO  | Adult    | SW | 30  | Development  | NR             | NOEL | 3.98E+07 | 96153                                  |
| <i>Skeletonema costatum</i>     | Algae       | TBTC1 | NR       | SW | 4   | Growth       | NR             | EC10 | 3.43E+02 | <a href="#">Bao et al.<sup>7</sup></a> |
| <i>Skeletonema costatum</i>     | Algae       | TBTO  | NR       | SW | 14  | Population   | NR             | EC10 | 4.98     | 99254                                  |
| <i>Styela plicata</i>           | Ascidiacea  | TBTO  | NR       | SW | 6   | Cellular     | Hemolymph      | NOEC | 1.99E+02 | 71842                                  |
| <i>Styela plicata</i>           | Ascidiacea  | TBTO  | NR       | SW | 6   | IMM          | Hemocyte       | NOEC | 1.99E+02 | 71842                                  |
| <i>Styela plicata</i>           | Ascidiacea  | TBTO  | NR       | SW | 6   | Cellular     | Hemolymph      | NOEC | 1.99E+03 | 71842                                  |
| <i>Styela plicata</i>           | Ascidiacea  | TBTO  | NR       | SW | 6   | IMM          | Hemocyte       | NOEC | 1.99E+03 | 71842                                  |
| <i>Styela plicata</i>           | Ascidiacea  | TBTO  | NR       | SW | 6   | IMM          | Hemocyte       | NOEC | 1.99E+03 | 71842                                  |
| <i>Synechococcus sp.</i>        | Algae       | TBTC1 | NR       | SW | 4   | Growth       | NR             | EC10 | 1.60E+04 | <a href="#">Bao et al.<sup>7</sup></a> |
| <i>Thalassiosira pseudonana</i> | Algae       | TBTC1 | NR       | SW | 4   | Growth       | NR             | EC10 | 2.55E+02 | <a href="#">Bao et al.<sup>7</sup></a> |
| <i>Tigriopus japonicus</i>      | Crustaceans | TBT   | Nauplii  | SW | 14  | Population   | F1 Generation  | NOEC | 4.08E+03 | 104287                                 |
| <i>Tigriopus japonicus</i>      | Crustaceans | TBT   | Nauplii  | SW | 14  | Reproduction | NR             | NOEC | 4.08E+03 | 104287                                 |
| <i>Tigriopus japonicus</i>      | Crustaceans | TBT   | Nauplii  | SW | 14  | Reproduction | NR             | NOEC | 4.08E+03 | 104287                                 |
| <i>Tigriopus japonicus</i>      | Crustaceans | TBT   | Nauplii  | SW | 14  | Reproduction | NR             | NOEC | 4.08E+03 | 104287                                 |
| <i>Tigriopus japonicus</i>      | Crustaceans | TBT   | Adult    | SW | 4   | Mortality    | NR             | NOEC | 8.16E+03 | 111315                                 |
| <i>Ulva pertusa</i>             | Algae       | TBTO  | NR       | SW | 4   | Reproduction | NR             | NOEC | 4.78E+03 | 108114                                 |

DBT

|                       |          |     |        |    |    |        |    |      |          |      |
|-----------------------|----------|-----|--------|----|----|--------|----|------|----------|------|
| <i>Mytilus edulis</i> | Molluscs | DBT | Larvae | SW | 33 | Growth | NR | NOEC | 1.01E+03 | 6982 |
|-----------------------|----------|-----|--------|----|----|--------|----|------|----------|------|

|                              |          |       |          |    |     |           |                          |      |          |       |
|------------------------------|----------|-------|----------|----|-----|-----------|--------------------------|------|----------|-------|
| <i>Mytilus edulis</i>        | Molluscs | DBT   | Larvae   | SW | 33  | Growth    | NR                       | MATC | 3.18E+03 | 6982  |
| <i>Nassarius reticulatus</i> | Molluscs | DBTC1 | Adult    | SW | 91  | Growth    | Penis                    | NOEC | 1.95E+02 | 79867 |
| <i>Oncorhynchus mykiss</i>   | Fish     | DBTC1 | Sac Fry  | FW | 110 | Mortality | NR                       | NOEC | 2.02E+04 | 5674  |
| <i>Oryzias latipes</i>       | Fish     | DBTC1 | Juvenile | FW | 28  | Cellular  | Multiple<br>Tissue/Organ | NOEC | 1.25E+08 | 9631  |
| <i>Poecilia reticulata</i>   | Fish     | DBTC1 | Juvenile | FW | 28  | Cellular  | Multiple<br>Tissue/Organ | NOEC | 1.25E+08 | 9631  |
| <i>Poecilia reticulata</i>   | Fish     | DBTC1 | NR       | FW | 30  | Mortality | NR                       | NOEC | 7.03E+05 | 12607 |

FW, Fresh Water; SW, Salt Water.

† Converted NOEC: NOEL = LOEL/2.

‡ Converted NOEC: NOEC = LOED/10.

**Table S3** Original references of the toxicity data cited in this paper, which were compiled in the ERED and ECOTOX database

| Reference Number | Author                                                                             | Source                                                                                | Publication<br>Year |
|------------------|------------------------------------------------------------------------------------|---------------------------------------------------------------------------------------|---------------------|
| ABB5             | Moore, D.W., T.M. Dillon and B.C. Suedel                                           | Aquat. Toxicol. 21: 181-198                                                           | 1991                |
| JA148            | Gibbs, P.E., P.L. Pascoe and G.R. Burt                                             | J. Mar. Biol. Assoc. U. K. 68: 715-731.                                               | 1988                |
| JA308            | Moore, D.W., T.M. Dillon and B.C. Suede                                            | Aquat. Toxicol. 21: 181-198                                                           | 1991                |
| JA371            | Rice, S.D., J.W. Short                                                             | Mar. Environ. Res. 27: 137-145                                                        | 1989                |
| JA449            | Thain, J.E.                                                                        | Oceans '86 International Ocean Conference: Proceedings Sept 23-25; Washington.<br>DC. | 1986                |
| JA56             | Bryan, G.W., P.E. Gibbs and G.R. Burt                                              | J. Mar. Biol. Assoc. U. K. 68: 733-744.                                               | 1988                |
| JA58             | Bryan, G.W., P.E. Gibbs, R.J. Huggett, L.A. Curtis, D.S. Bailey and D.M.<br>Dauer. | Mar. Pollut. Bull. 20(9): 458-462.                                                    | 1989                |
| JB1              | Batley, G.E., Fuhua, C., Brockbank, I. and Flegg, K.J.                             | Aust. J. Mar. Freshwater Res. 40: 49-54                                               | 1989                |
| JB18/79867       | Bryan, G.W., P.E. Gibbs, G.R. Burt, L.G. Hummerstone                               | J. Mar. Biol. Assoc. U. K. 67: 525-544                                                | 1987                |
| MEC03-047        | Qun-Fang, Z., J. Gui-Bin, L. Ji-Yan                                                | Arch. Environ. Contam. Toxicol. 42: 332-337                                           | 2002                |
| MEC03-128        | Sole, M., M. Morcillo, C. Porte                                                    | Bull. Environ. Contam. Toxicol. 64: 852-858                                           | 2000                |

|                  |                                                                                                                                          |                                                                        |      |
|------------------|------------------------------------------------------------------------------------------------------------------------------------------|------------------------------------------------------------------------|------|
| MEC03-236        | Barreiro, R., R. Gonzalez, M. Quintela, J.M. Ruiz                                                                                        | Mar. Ecol. Prog. Ser. 218: 203-212                                     | 2001 |
| MEC04-095        | Lundebye, A.K., W.J. Langston, M.H. Depledge                                                                                             | Ecotoxicology 5: 127-136                                               | 1997 |
| MEC04-222        | Schwaiger, J., F. Bucher, H. Ferling, W. Kalbfus, R-D. Negele                                                                            | Aquat. Toxicol. 23: 31-48                                              | 1992 |
| NewFields07-004† | Gomez-Ariza, J.L., M.M. Santos, E. Morales, I. Giraldez, D. Sanchez-Rodas,<br>N. Viera, J.F. Kemp, J.P. Boon and C.C. Ten-Haller-Tjabbes | Chemosphere 64: 1100-1108                                              | 2006 |
| NewFields09-22   | Chan, K.M., S-G. Cheung, Z. Cai, J-W. Qiu                                                                                                | Ecotoxicology 17: 860-868                                              | 2008 |
| SEQ97-1          | Horiguchi, T., H. Shiraishi, M. Shimizu, M. and M. Morita                                                                                | Environ. Pollut. 095: 85-91                                            | 1997 |
| SEQ98-14         | Scammell, M.S., G.E. Batley and C.I. Brockbank                                                                                           | Arch. Environ. Contam. Toxicol. 20: 276-281                            | 1991 |
| SEQ98-29         | Bauer, B., P. Fioroni, I. Ide, S. Liebe, J. Oehlmann, E. Stroben and B. Watermann                                                        | Hydrobiologia 309: 15-27, 1995                                         | 1995 |
| URS18            | Fent, K. and J.J. Stegeman                                                                                                               | Aquat. Toxicol. 24: 219-240                                            | 1992 |
| URS219           | van Slooten, K.B. and J. Tarradellas                                                                                                     | Environ. Toxicol. Chem. 13: 755-762                                    | 1994 |
| URS235           | Widdows, J., and D.S. Page                                                                                                               | Mar. Environ. Res. 35: 233-249                                         | 1993 |
| URS62            | Davies, I.M., J. Drinkwater, J.C. Mckie and P. Balls                                                                                     | Oceans '87 Proceedings International Organotin Symposium 4: 1477-1481. | 1987 |
| Weston05-033     | Chandler, G.T., M.R. Shipp and T.L. Donelan                                                                                              | J. Exp. Mar. Biol. Eco. 213: 95-110                                    | 1997 |
| Weston05-037     | Bekri, K. and E.P.E. Iletier                                                                                                             | Aquat. Toxicol. 66: 39-53                                              | 2004 |
| Weston05-046     | Nakayama, K., Y. Oshima, K. Nagafuchi, T. Hano, Y. Shimasaki and T. Honjo                                                                | Environ. Toxicol. Chem. 24: 591-596                                    | 2005 |
| Weston05-130     | Sole, M.                                                                                                                                 | Comp. Biochem. Physiol. 125C: 93-101                                   | 2000 |
| Weston05-148     | Pellizzato, F., E. Centanni, MG. Marin, V. Moschino, and B. Pavoni                                                                       | Sci. Total Environ. 332: 89-100                                        | 2004 |
| Weston06-064     | Meador, J.P., T.K. Collier and J.E. Stein                                                                                                | Aquatic. Conserv.: Mar. Freshw. Ecosyst. 12: 539-551                   | 2002 |
| Weston06-071     | Hagger, J.A., M.A. Depledge, J. Oehlmann, S. Jobling and T.S. Galloway                                                                   | Environ. Health. Persp.                                                | 2006 |
| 847              | Kuhn, R., M. Pattard, K.D. Pernak and A. Winter                                                                                          | Water Res. 23(4): 501-510                                              | 1989 |
| 3199             | Bushong, S.J., M.C. Ziegenfuss, M.A. Unger and L.W., Jr. Hall                                                                            | Environ. Toxicol. Chem. 9(3): 359-366                                  | 1990 |
| 5674             | De Vries, H., A.H. Penninks, N.J. Snoeij and W. Seinen                                                                                   | Sci. Total Environ. 103(2-3): 229-243                                  | 1991 |
| 6628             | Kuhn, R.                                                                                                                                 | Forschungsbericht 10603052, Mrz:                                       | 1988 |
| 6982             | Lapota, D., D.E. Rosenberger, M.F. Platter-Rieger and P.F. Seligman                                                                      | Mar. Biol. 115: 413-419                                                | 1993 |
| 7176             | Day, K.E., R.J. Maguire, D. Milani and S.P. Batchelor                                                                                    | Water Qual. Res. J. Can. 33(1): 111-132                                | 1998 |
| 9631             | Wester, P.W. and J.H. Canton                                                                                                             | Comp. Biochem. Physiol. C Comp. Pharmacol. 100(1/2): 115-117           | 1991 |
| 9998             | Bryan, G.W., P.E. Gibbs, G.R. Burt and L.G. Hummerstone                                                                                  | J. Mar. Biol. Assoc. U. K. 67(3): 525-544                              | 1987 |
| 12607            | Wester, P.W. and J.H. Canton                                                                                                             | Aquat. Toxicol. 10(2-3): 143-165                                       | 1987 |

|       |                                                                                                                          |                                                                                                           |      |
|-------|--------------------------------------------------------------------------------------------------------------------------|-----------------------------------------------------------------------------------------------------------|------|
| 14746 | Davidson, B.M., A.O. Valkirs and P.F. Seligman                                                                           | NOSC-TR-1116/AD-A175-294-8, Natl. Tech. Info. Serv. , Springfield, VA: 40 p.                              | 1986 |
| 14985 | Burrige, T.R., T. Lavery and P.K.S. Lam                                                                                  | Bull. Environ. Contam. Toxicol. 55(4): 621-628                                                            | 1995 |
| 17390 | Salazar, S.M.                                                                                                            | Tech. Rep. No. 1039, Naval Ocean Systems Center, San Diego, CA: 19 p.                                     | 1985 |
| 17785 | Dahl, B. and H. Blanck                                                                                                   | Aquat. Toxicol. 34(4): 305-325                                                                            | 1996 |
| 19280 | Stenalt, E., B. Johansen, S.V. Lillienkjold and B.W. Hansen                                                              | Ecotoxicol. Environ. Saf. 40(3): 212-225                                                                  | 1998 |
| 20032 | Baer, K.N. and K.D. Owens                                                                                                | Bull. Environ. Contam. Toxicol. 62(2): 214-221                                                            | 1999 |
| 20478 | Stronkhorst, J., B. Van Hattum and T. Bowmer                                                                             | Environ. Toxicol. Chem. 18(10): 2343-2351                                                                 | 1999 |
| 56312 | Becker, E.                                                                                                               | Umweltbundesamt, Entwurf fur den BLAK QZ, Stand 26. 3. :                                                  | 1992 |
| 59761 | Brooke, L.T., D.J. Call, S.H. Poirier, T.P. Markee, C.A. Lindberg, D.J. McCauley and P.G. Simonson                       | Center for Lake Superior Environmental Studies, University of Wisconsin, Superior, WI: 20 p.              | 1986 |
| 60672 | Forbis, A.D. and C. Lochhaas                                                                                             | Final Report 38310, Analytical Bio-Chemistry Laboratory, Columbia, MO: 318 p.                             | 1990 |
| 60780 | Matthiessen, P.                                                                                                          | Proc. Int. Control. Released Symp. , Sept. 16-18, 1974, Akron, OH: 25. 1 - 25. 17                         | 1974 |
| 69835 | Tillmann, M., U. Schulte-Oehlmann, M. Duft, B. Markert and J. Oehlmann                                                   | Ecotoxicology 10(6): 373-388                                                                              | 2001 |
| 71842 | Raftos, D. and A. Hutchinson                                                                                             | Biol. Bull. (Woods Hole) 192(1): 62-72                                                                    | 1997 |
| 73494 | Rhea, M.R., A. Proctor and R.D. Cardwell                                                                                 | Lab. Proj. No. 44-1807-16-01-MYSID, Elf Atochem North America Inc. , Philadelphia, PA: 33 p.              | 1995 |
| 73495 | Miana, P., S. Scotto, G. Perin and E. Argese                                                                             | Environ. Technol. 14: 175-181                                                                             | 1993 |
| 73496 | Brix, K.V., F.P. Sweeney and R.D. Cardwell                                                                               | Lab. Proj. No. 55-1807-05 (02A), Elf Atochem North America Inc. , Philadelphia, PA: 25 p.                 | 1994 |
| 73497 | Harding, M.J.C., S.K. Bailey and I.M. Davies                                                                             | Napier Univ. of Edinburgh and The Scottish Off. Agric. , Environ. & Fish Dep. , Aberdeen, Scotland: 75 p. | 1996 |
| 80004 | Morley, N.J., K.M.Y. Leung, D. Morritt and M. Crane                                                                      | Chemosphere 56(4): 353-358                                                                                | 2004 |
| 82331 | Lee, W.K., K.W. Lee, E.J. Kwak, S.W. Yang, K.S. Yang, J.C. Park, H.S. Joo, W.J. Lee and W.B. Lee                         | Water Sci. Technol. 47(9): 65-70                                                                          | 2003 |
| 82438 | Oberdorster, E.                                                                                                          | Ph. D. Thesis, Duke University, Durham, NC: 161 p.                                                        | 1997 |
| 85793 | Oliveira Ribeiro, C.A., F. Filipak Neto, M. Mela, P.H. Silva, M.A.F. Randi, I.S. Rabbito, J.R.M. Alves Costa and E. Pell | Environ. Res. 101(1): 74-80                                                                               | 2006 |
| 86339 | Bartlett, A.J.                                                                                                           | Ph. D. Thesis, Univ. of Waterloo, Ontario, Canada: 190 p.                                                 | 2004 |
| 90044 | Arrhenius, A., T. Backhaus, F. Gronvall, M. Junghans, M. Scholze and H. Blanck                                           | Arch. Environ. Contam. Toxicol. 50(3): 335-345                                                            | 2006 |



|        |                                                                                                           |                                                                                                              |      |
|--------|-----------------------------------------------------------------------------------------------------------|--------------------------------------------------------------------------------------------------------------|------|
| 93809  | Coelho, M.R., W.J. Langston and M.J. Bebianno                                                             | Chemosphere 63(9): 1499-1505                                                                                 | 2006 |
| 94583  | Jantataeme, S.                                                                                            | Ph. D. Thesis, University of Michigan, Ann Arbor, MI: 57 p.                                                  | 1991 |
| 95703  | Santos, M.M., L.F.C. Castro, M.N. Vieira, J. Micael, R. Morabito, P. Massanisso and M.A. Reis-Henriques   | Comp. Biochem. Physiol. C Pharmacol. Toxicol. Endocrinol. 141(1): 101-109                                    | 2005 |
| 96057  | Santos, M.M., M.A. Reis-Henriques, M.N. Vieira and M. Sole                                                | Ecotoxicol. Environ. Saf. 64(2): 155-162                                                                     | 2006 |
| 96153  | Shimasaki, Y., Y. Oshima, S. Inoue, Y. Inoue, I.J. Kang, K. Nakayama, H. Imoto and T. Honjo               | Mar. Environ. Res. 62: S245 - S248                                                                           | 2006 |
| 99011  | Walker, W.W., C.S. Heard, K. Lotz, T.F. Lytle, W.E. Hawkins, C.S. Barnes, D.H. Barnes and R.M. Overstreet | In: Conference: Oceans 89 Proc. , Sept. 18-21, 1989, Seattle, WA, Organotin Symp. (IEEE-89CH2780-5): 516-524 | 1989 |
| 99046  | Wester, P.W. and J.G. Vos                                                                                 | Ecotoxicology 2: 21-44                                                                                       | 1994 |
| 99181  | Janer, G., A. Lyssimachou, J. Bachmann, J. Oehlmann, U. Schulte-Oehlmann and C. Porte                     | Steroids 71(6): 435-444                                                                                      | 2006 |
| 99247  | Arredondo, L.A., K.V. Brix and R.D. Cardwell                                                              | Parametrix Inc. : 47 p.                                                                                      | 1996 |
| 99254  | EG                                                                                                        | Project Number R11, Rep. BP-81-6-109: 19 p.                                                                  | 1981 |
| 99255  | EG                                                                                                        | Project Number R11, Rep. BP-81-4-55: 2 p.                                                                    | 1981 |
| 102066 | Watanabe, T., I. Yuyama and S. Yasumura                                                                   | J. Exp. Mar. Biol. Ecol. 339(2): 177-188                                                                     | 2006 |
| 104071 | Lau, M.C., K.M. Chan, K.M.Y. Leung, T.G. Luan, M.S. Yang and J.W. Qiu                                     | Chemosphere 69: 135-144                                                                                      | 2007 |
| 104287 | Lee, K.W., S. Raisuddin, D.S. Hwang, H.G. Park, H.U. Dahms, I.Y. Ahn and J.S. Lee                         | Chemosphere 72: 1359-1365                                                                                    | 2008 |
| 105674 | Oberdorster, E., D. Rittschof and P. McClellan-Green                                                      | Mar. Pollut. Bull. 36(2): 144-151                                                                            | 1998 |
| 106560 | Micael, J., M.A. Reis-Henriques, A.P. Carvalho and M.M. Santos                                            | Environ. Int. 33(8): 1035-1039                                                                               | 2007 |
| 108114 | Han, T., Y.S. Han, C.Y. Park, Y.S. Jun, M.J. Kwon, S.H. Kang and M.T. Brown                               | Environ. Pollut. 153(3): 699-705                                                                             | 2008 |
| 110086 | Stauber, J.L., M.T. Binet, V.W.W. Bao, J. Boge, A.Q. Zhang, K.M.Y. Leung and M.S. Adams                   | Environ. Toxicol. 23(5): 617-625                                                                             | 2008 |
| 111315 | Lee, K.W., S. Raisuddin, D.S. Hwang, H.G. Park and J.S. Lee                                               | Environ. Toxicol. 22(5): 532-538                                                                             | 2007 |
| 115744 | Bennett, S.C., S.W.B. Irwin and S.M. Fitzpatrick                                                          | J. Helminthol. 77(4): 291-296                                                                                | 2003 |
| 150898 | Call, D.J. and D.L. Geiger                                                                                | Center for Lake Superior Environmental Studies, University of Wisconsin, Superior, WI: 318 p.                | 1992 |

### Supplementary references

1. D. d. Zwart, in *Species Sensitivity Distributions in Ecotoxicology*, eds. L. P. W. S. II and T. P. Traas, Lewis Publishers, Boca Raton, FL, Editon edn., 2002, pp. 133-154.
2. D. F. Kalf, T. Crommentuijn and E. J. vandePlassche, *Ecotoxicol. Environ. Saf.*, 1997, **36**, 89-97.
3. D. T. H. M. Sijm, A. P. v. Wezel and T. Crommentuijn, in *Species Sensitivity Distributions in Ecotoxicology*, eds. L. Posthuma, G. W. S. II and T. P. Traas, Lewis Publishers, Boca Raton, FL, Editon edn., 2002, pp. 221-253.
4. P. E. Gibbs, G. W. Bryan, P. L. Pascoe and G. R. Burt, *J. Mar. Biol. Assoc. UK.*, 1990, **70**, 639-656.
5. J. W. Short, S. D. Rice, C. C. Brodersen and W. B. Stickle, *Mar. Biol.*, 1989, **102**, 291-297.
6. J. Widdows, K. A. Burns, N. R. Menon, D. S. Page and S. Soria, *Journal of Experimental Marine Biology and Ecology*, 1990, **138**, 99-117.
7. V. W. W. Bao, K. M. Y. Leung, J.-W. Qiu and M. H. W. Lam, *Mar. Pollut. Bull.*, 2011, **62**, 1147-1151.
